# Supplementary material for: Clinical outcomes of early gastric cardiac cancer treated with endoscopic submucosal dissection in patients with different indications
Source: Research Square preprint supplement (doi:10.21203/rs.3.rs-18393/v4), 2020-11-04
Supplement: Supplementary file 1 [file 7b57eca8b6724fd4937d6351.docx]

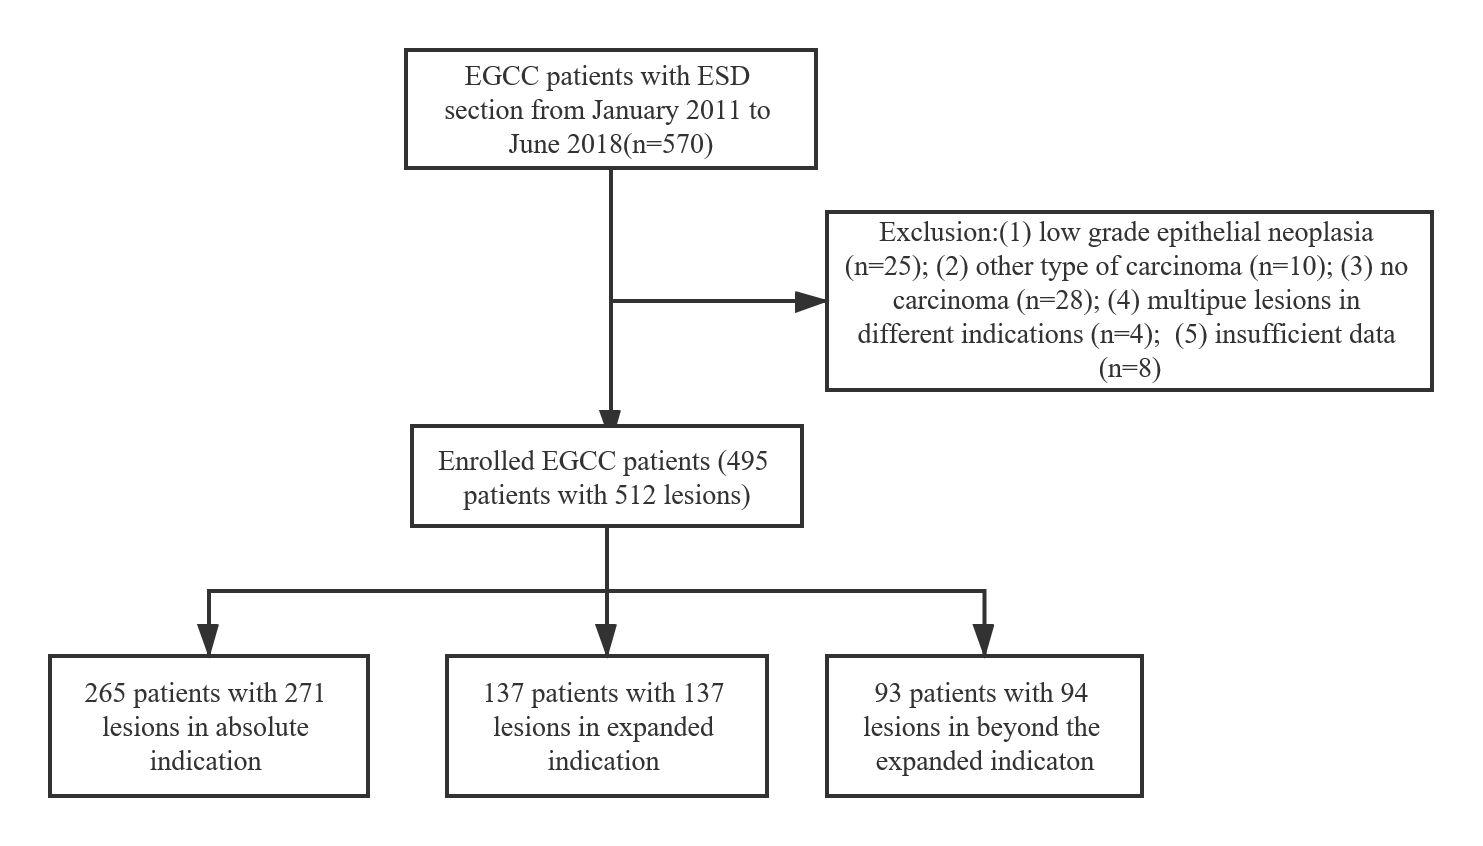


Supplementary Figure 1. Flow diagram for the patients in this study.


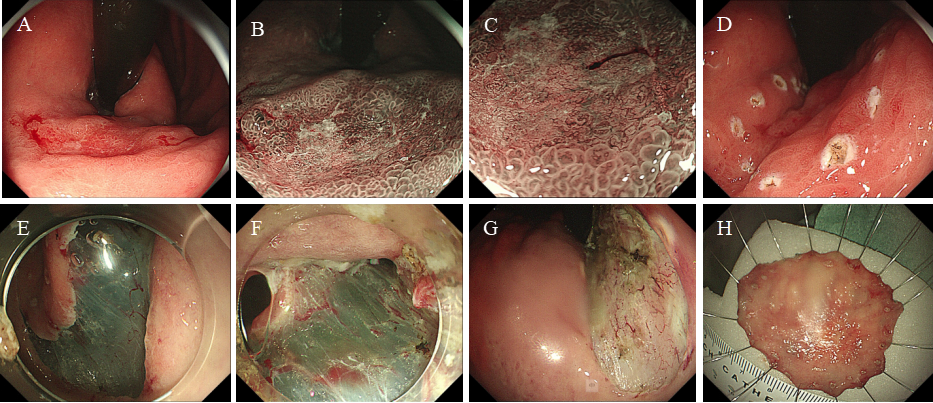


Supplementary Figure 2 The endoscopic submucosal dissection for early gastric cardiac cancer. A: White-light endoscopy (WLE) image of an early gastric cardiac cancer. B: The edge of the tumor lesion in magnifying endoscopy with narrow-banding imaging (ME-NBI). C: The destructive microstructures and fine reticular microvascular morphology in ME-NBI. D: Marking the edge of tumor margin. E: Cut around the marking points. F: Submucosal dissection. G: Wound surface after dissection. H：The resected specimen.


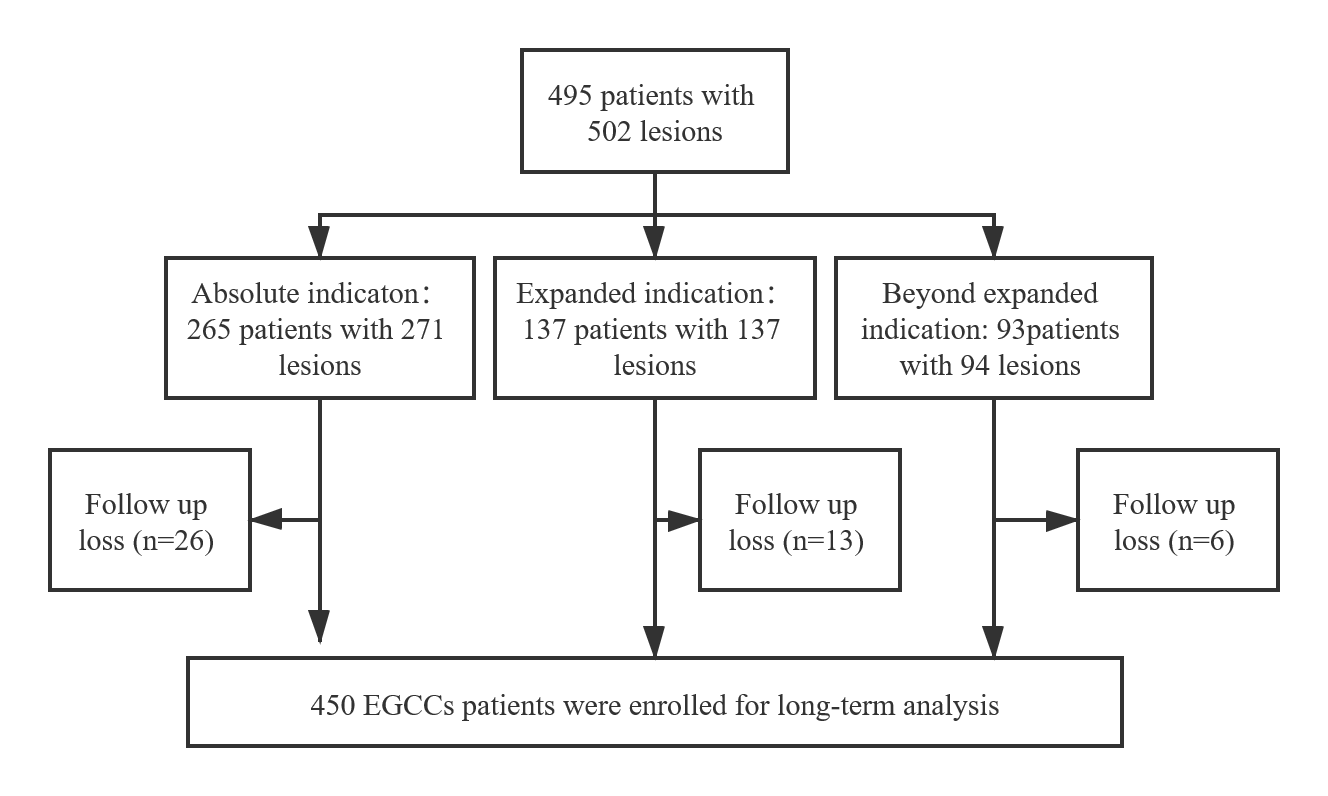


Supplementary Figure 3 Patient treatment flow chart


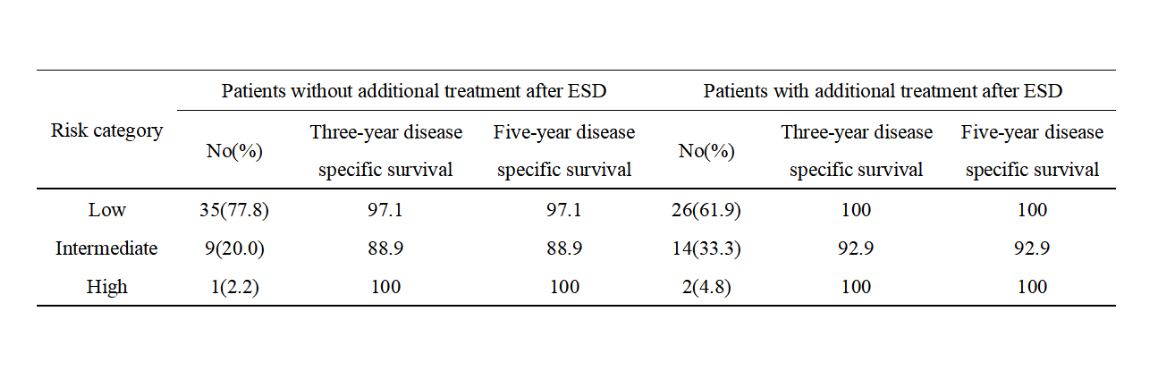


Supplementary table 1 Disease specific survival at 3 and 5 years among BEI patients with or without additional surgery after ESD for EGCC which were divided into three risk categories according to the eCura system
